# Supplementary material for: Synthesis and characterization of Pt(ii)-based potent anticancer agents with minimum normal cell toxicity: their bio-activity and DNA-binding properties
Source: Royal Society of Chemistry journal article supplement (doi:10.1039/c9nj03108a), 2019-01-01
Supplement: c9nj03108a1.pdf [file c9nj03108a1.pdf]

Supplementary Material (ESI) for New Journal of Chemistry  
This journal is © The Royal Society of Chemistry

## **Electronic Supplementary Information (ESI)**

**of**

**Synthesis and characterization of Pt(II) based potent anticancer agents with minimum normal cell toxicity: their bio-activity and DNA binding property**

Sujay Mahata,<sup>a</sup> Subhajit Mukherjee,<sup>a</sup> Swarup Kumar Tarai,<sup>a</sup> Angana Pan,<sup>a</sup> Ishani Mitra,<sup>a</sup> Soumojit Pal,<sup>b</sup> Sudipta Maitra<sup>b</sup> and Sankar Ch. Moi<sup>a\*</sup>

- a. Department of Chemistry, National Institute of Technology Durgapur, M. G. Avenue, Durgapur-713209, West Bengal, India
- b. Department of Zoology, Visva-Bharati University, Santinikatan, Bolpur-731235, West Bengal, India

\*Correspondence author's e. mail: [sankarmoi67@yahoo.com](mailto:sankarmoi67@yahoo.com)

## Table of Contents

|    |                     |                                                                                                                                                                                                                                                                               |
|----|---------------------|-------------------------------------------------------------------------------------------------------------------------------------------------------------------------------------------------------------------------------------------------------------------------------|
| 1  | <b>ESI Fig. S1</b>  | IR spectrum of DMEEDA layered over a NaCl disk.                                                                                                                                                                                                                               |
| 2  | <b>ESI Fig. S2</b>  | IR spectrum of Complex <b>1</b> in KBr disk.                                                                                                                                                                                                                                  |
| 3  | <b>ESI Fig. S3</b>  | ( <b>A</b> ) $^1\text{H}$ NMR spectrum of complex <b>1</b> at 400 MHz in DMSO- $d_6$ and ( <b>B</b> ) its magnified view in the range 2.4 to 3.2 ppm.                                                                                                                         |
| 4  | <b>ESI Fig. S4</b>  | $^{13}\text{C}$ NMR spectrum of complex <b>1</b> at 100 MHz in DMSO- $d_6$ .                                                                                                                                                                                                  |
| 5  | <b>ESI Fig. S5</b>  | ESI-Mass spectrum of complex <b>1</b> mixed solvent (water in DMSO).                                                                                                                                                                                                          |
| 6  | <b>ESI Fig. S6</b>  | IR spectrum of complex <b>2</b> in KBr disk.                                                                                                                                                                                                                                  |
| 7  | <b>ESI Fig. S7</b>  | $^1\text{H}$ NMR spectrum of complex <b>2</b> in $\text{D}_2\text{O}$ and DMSO- $d_6$ mixed solvent.                                                                                                                                                                          |
| 8  | <b>ESI Fig. S8</b>  | $^{13}\text{C}$ NMR spectrum of complex <b>2</b> at 100 MHz in DMSO- $d_6$ .                                                                                                                                                                                                  |
| 9  | <b>ESI Fig. S9</b>  | ESI-Mass spectrum of complex <b>2</b> in water.                                                                                                                                                                                                                               |
| 10 | <b>ESI Fig. S10</b> | Job's plot for the formation of complex <b>3</b> .                                                                                                                                                                                                                            |
| 11 | <b>ESI Fig. S11</b> | Job's Plot for the formation of Complex <b>4</b> .                                                                                                                                                                                                                            |
| 12 | <b>ESI Fig. S12</b> | IR spectrum of complex <b>3</b> in KBr disk.                                                                                                                                                                                                                                  |
| 13 | <b>ESI Fig. S13</b> | $^1\text{H}$ NMR spectrum of complex <b>3</b> in DMSO- $d_6$ as solvent.                                                                                                                                                                                                      |
| 14 | <b>ESI Fig. S14</b> | $^{13}\text{C}$ NMR spectrum of complex <b>3</b> at 100 MHz in DMSO- $d_6$ .                                                                                                                                                                                                  |
| 15 | <b>ESI Fig. S15</b> | ESI-Mass spectrum of complex <b>3</b> in water.                                                                                                                                                                                                                               |
| 16 | <b>ESI Fig. S16</b> | IR spectrum of complex <b>4</b> in KBr disk.                                                                                                                                                                                                                                  |
| 17 | <b>ESI Fig. S17</b> | $^1\text{H}$ NMR spectrum of complex <b>4</b> in DMSO- $d_6$ as solvent                                                                                                                                                                                                       |
| 18 | <b>ESI Fig. S18</b> | $^{13}\text{C}$ NMR spectrum of complex <b>4</b> at 100 MHz in DMSO- $d_6$ .                                                                                                                                                                                                  |
| 19 | <b>ESI Fig. S19</b> | ESI-Mass spectrum of complex <b>4</b> in water.                                                                                                                                                                                                                               |
| 20 | <b>ESI Fig. S20</b> | UV spectra of solutions containing complex <b>1</b> upon addition of CT-DNA. Arrow indicates the change in the absorbance on addition of DNA. Inset: Plots of $[\text{DNA}]/[\epsilon_a - \epsilon_f]$ vs. $[\text{DNA}]$ for the titration of the complex <b>1</b> with DNA. |
| 21 | <b>ESI Fig. S21</b> | UV spectra of solutions containing complex <b>3</b> upon addition of CT-DNA. Arrow indicates the change in the absorbance on addition of DNA. Inset: Plots of $[\text{DNA}]/[\epsilon_a - \epsilon_f]$ vs. $[\text{DNA}]$ for the titration of the complex <b>3</b> with DNA. |
| 22 | <b>ESI Fig. S22</b> | UV spectra of solutions containing complex <b>4</b> upon addition of CT-DNA. Arrow indicates the change in the absorbance on addition of DNA. Inset: Plots of $[\text{DNA}]/[\epsilon_a - \epsilon_f]$ vs. $[\text{DNA}]$ for the titration of the complex <b>4</b> with DNA. |
| 23 | <b>ESI Fig. S23</b> | Emission spectra ( $\lambda = 537$ nm) for EB-DNA ( $[\text{EB}] = 20 \mu\text{M}$ , $[\text{DNA}] = 20 \mu\text{M}$ ) in the absence and presence of increasing amounts of complex <b>2</b> and Inset: Plot of $I_0/I$ versus $[\text{complex } 2]$ .                        |
| 24 | <b>ESI Fig. S24</b> | Emission spectra ( $\lambda = 537$ nm) for EB-DNA ( $[\text{EB}] = 20 \mu\text{M}$ , $[\text{DNA}] = 20 \mu\text{M}$ ) in the absence and presence of increasing amounts of complex <b>3</b> and Inset: Plot of $I_0/I$ versus $[\text{complex } 3]$ .                        |
| 25 | <b>ESI Fig. S25</b> | Emission spectra ( $\lambda = 537$ nm) for EB-DNA ( $[\text{EB}] = 20 \mu\text{M}$ , $[\text{DNA}] = 20 \mu\text{M}$ ) in the absence and presence of increasing amounts of complex <b>4</b> and Inset: Plot of $I_0/I$ versus $[\text{complex } 4]$ .                        |
| 26 | <b>ESI Fig. S26</b> | Scatchard plot for complex <b>1</b> .                                                                                                                                                                                                                                         |
| 27 | <b>ESI Fig. S27</b> | Scatchard plot for complex <b>2</b> .                                                                                                                                                                                                                                         |
| 28 | <b>ESI Fig. S28</b> | Scatchard plot for complex <b>3</b> .                                                                                                                                                                                                                                         |
| 29 | <b>ESI Fig. S29</b> | Scatchard plot for complex <b>4</b> .                                                                                                                                                                                                                                         |
| 30 | <b>1.</b>           | Cell lines and culture                                                                                                                                                                                                                                                        |

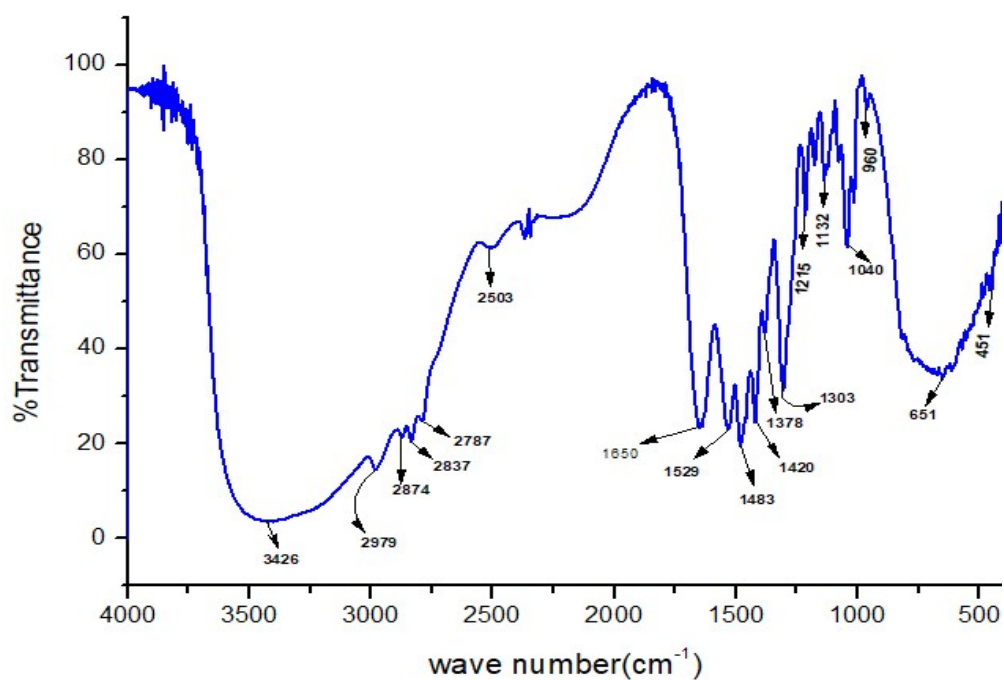

ESI Fig. S1: IR spectrum of DMEEDA layered over a NaCl disk.

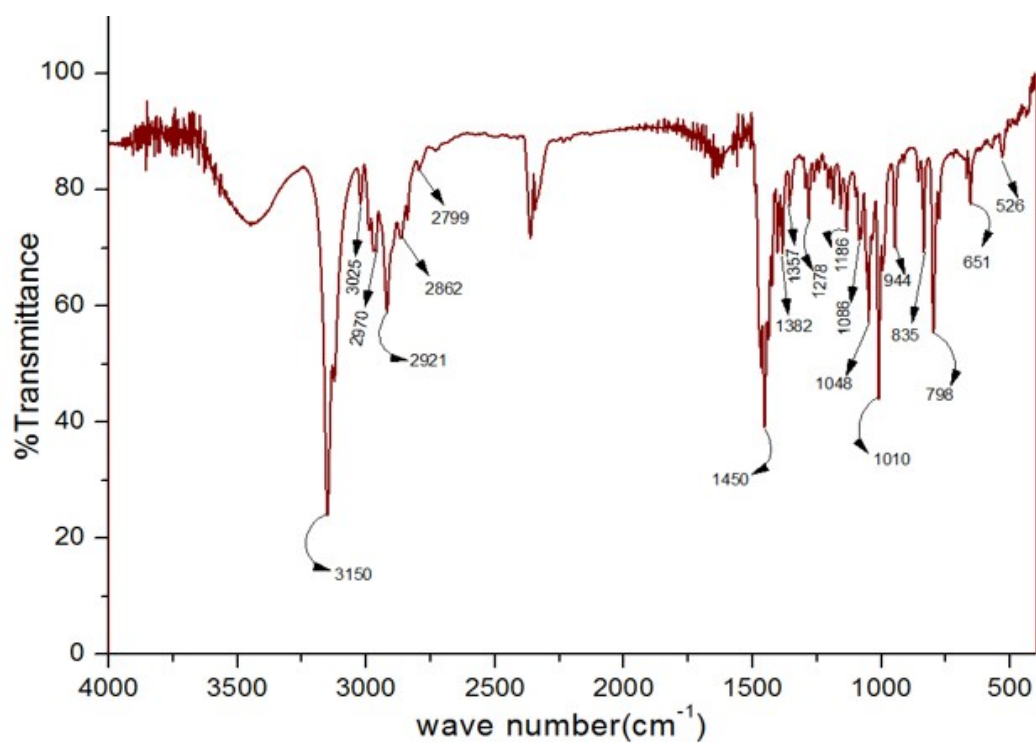

ESI Fig. S2. IR spectrum of Complex 1 in KBr disk.

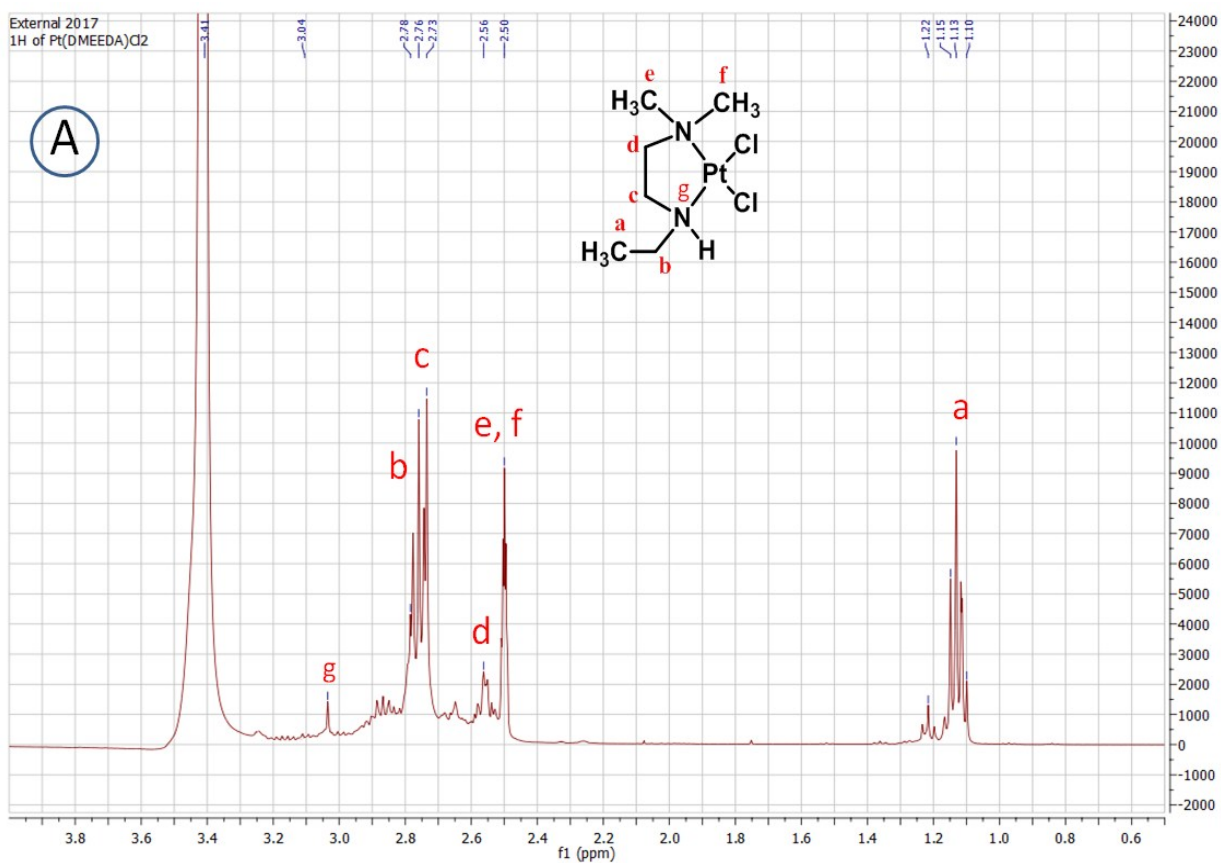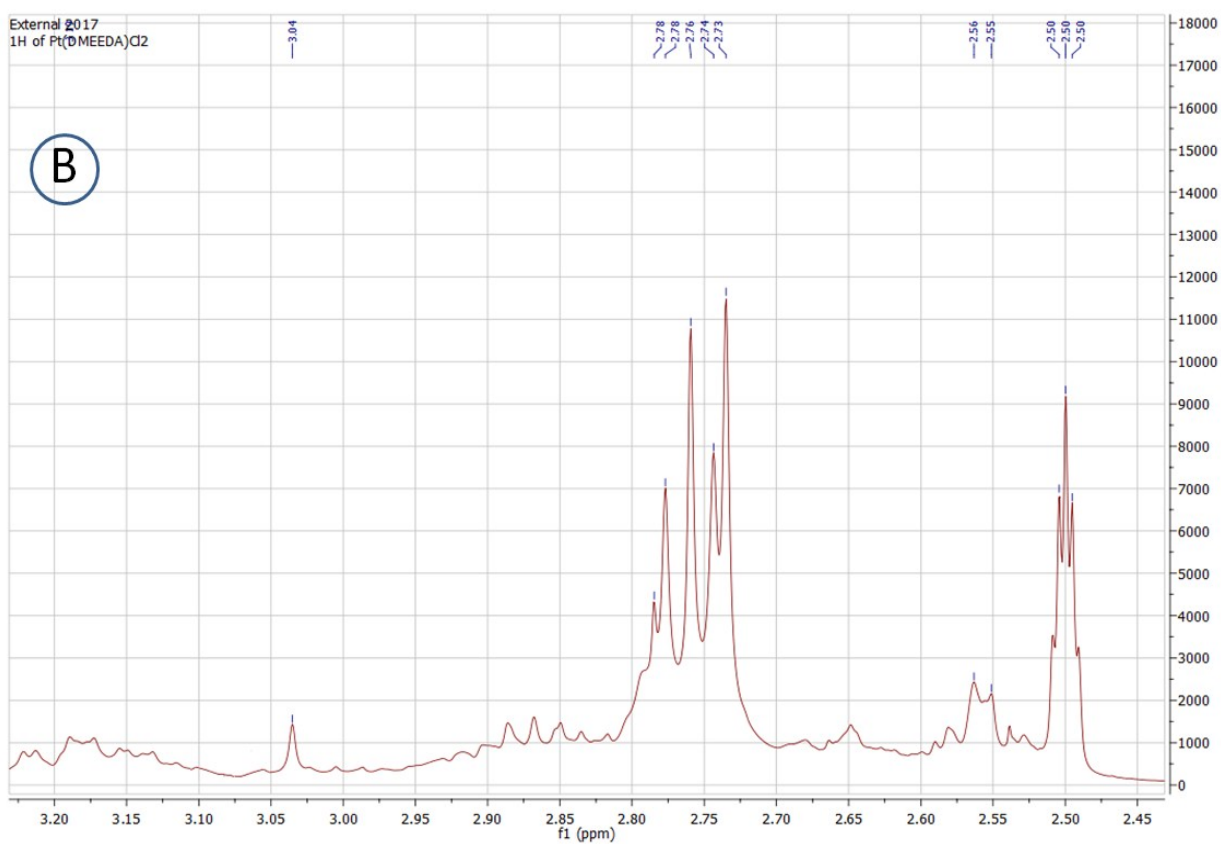

**ESI Fig. S3.** (A)  $^1\text{H}$  NMR spectrum of complex **1** at 400 MHz in  $\text{DMSO-d}_6$  and (B) its magnified view in the range 2.4 to 3.2 ppm.

<sup>13</sup>C of P (DMEEDA) Cl;

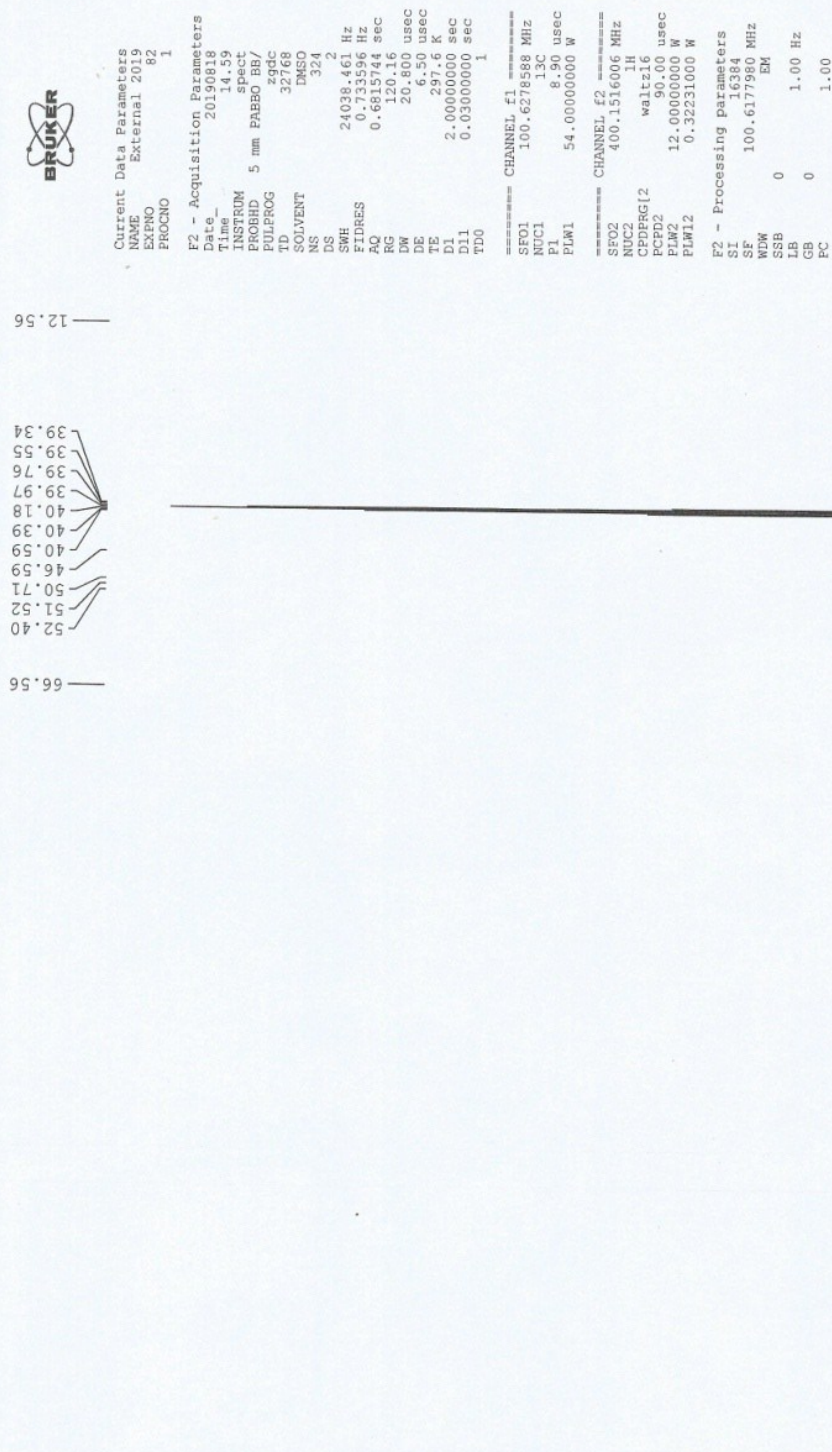

ESI Fig. S4. <sup>13</sup>C NMR spectrum of complex **1** at 100 MHz in DMSO-d<sub>6</sub>.



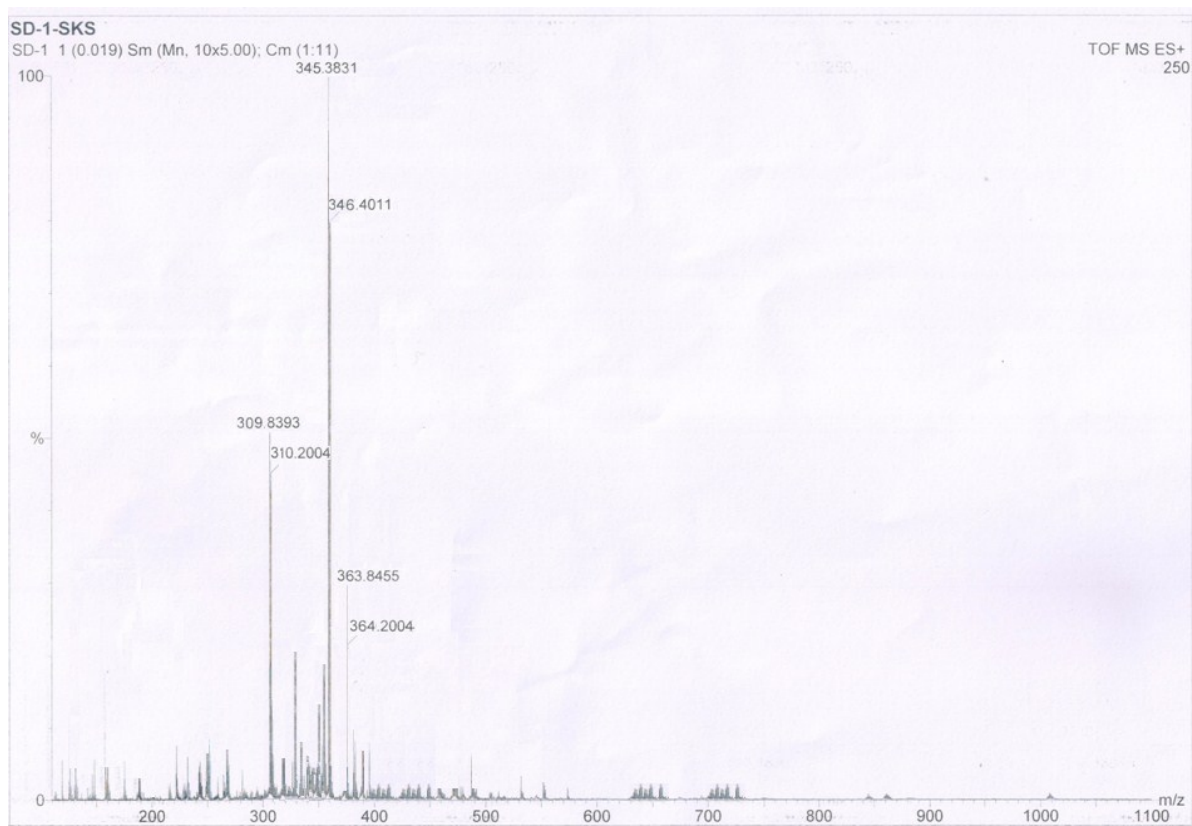

**ESI Fig. S5.** ESI-Mass spectrum of complex **1** mixed solvent (water in DMSO).

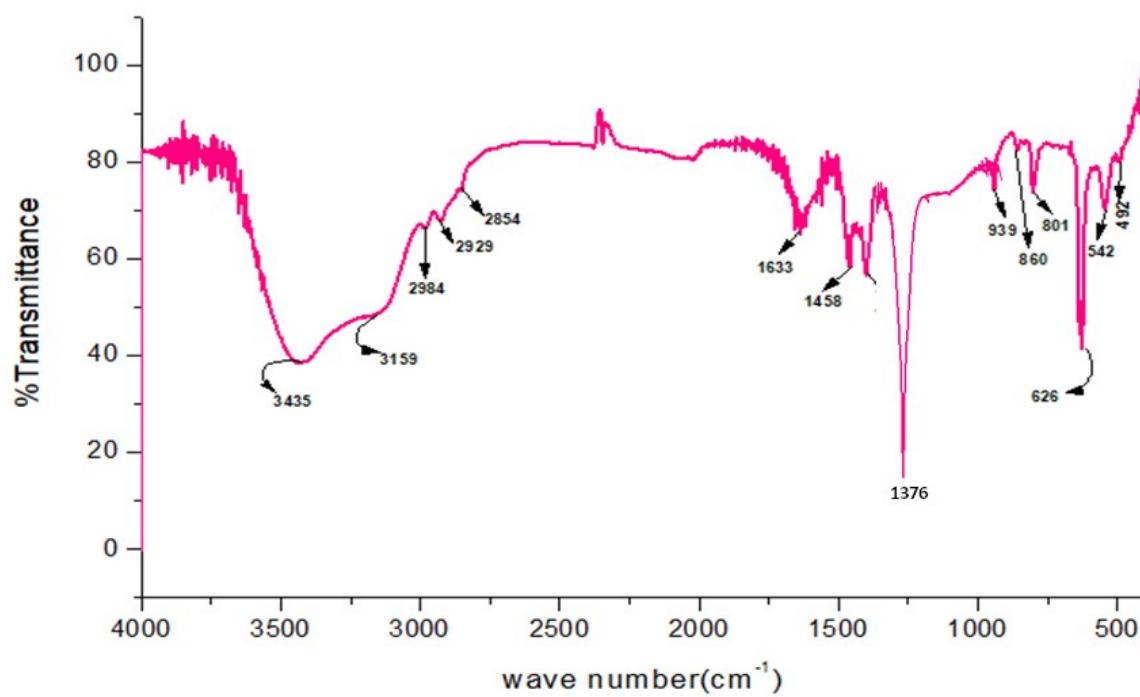

**ESI Fig. S6.** IR spectrum of complex **2** in KBr disk.

**ESI Fig. S7.**  $^1\text{H}$  NMR spectrum of complex **2** in  $\text{D}_2\text{O}$  and  $\text{DMSO-d}_6$  mixed solvent (Inset: Magnified view).

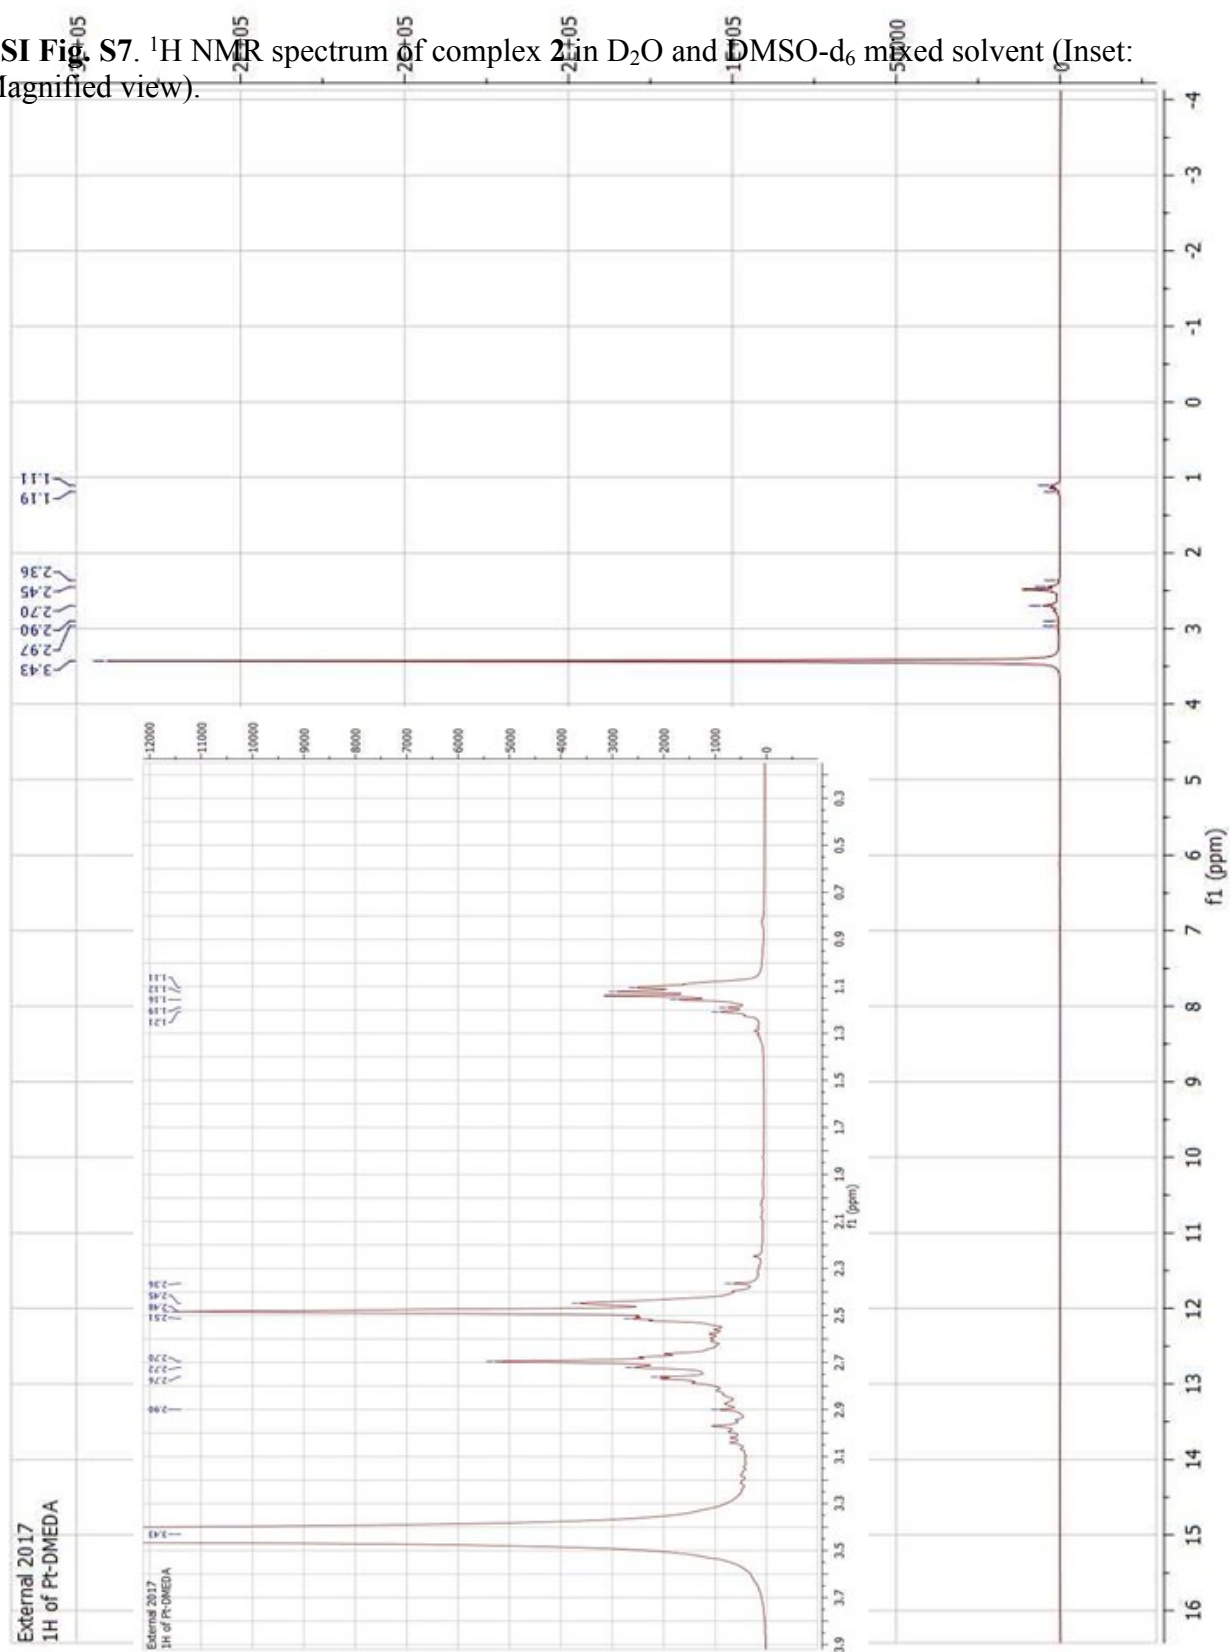

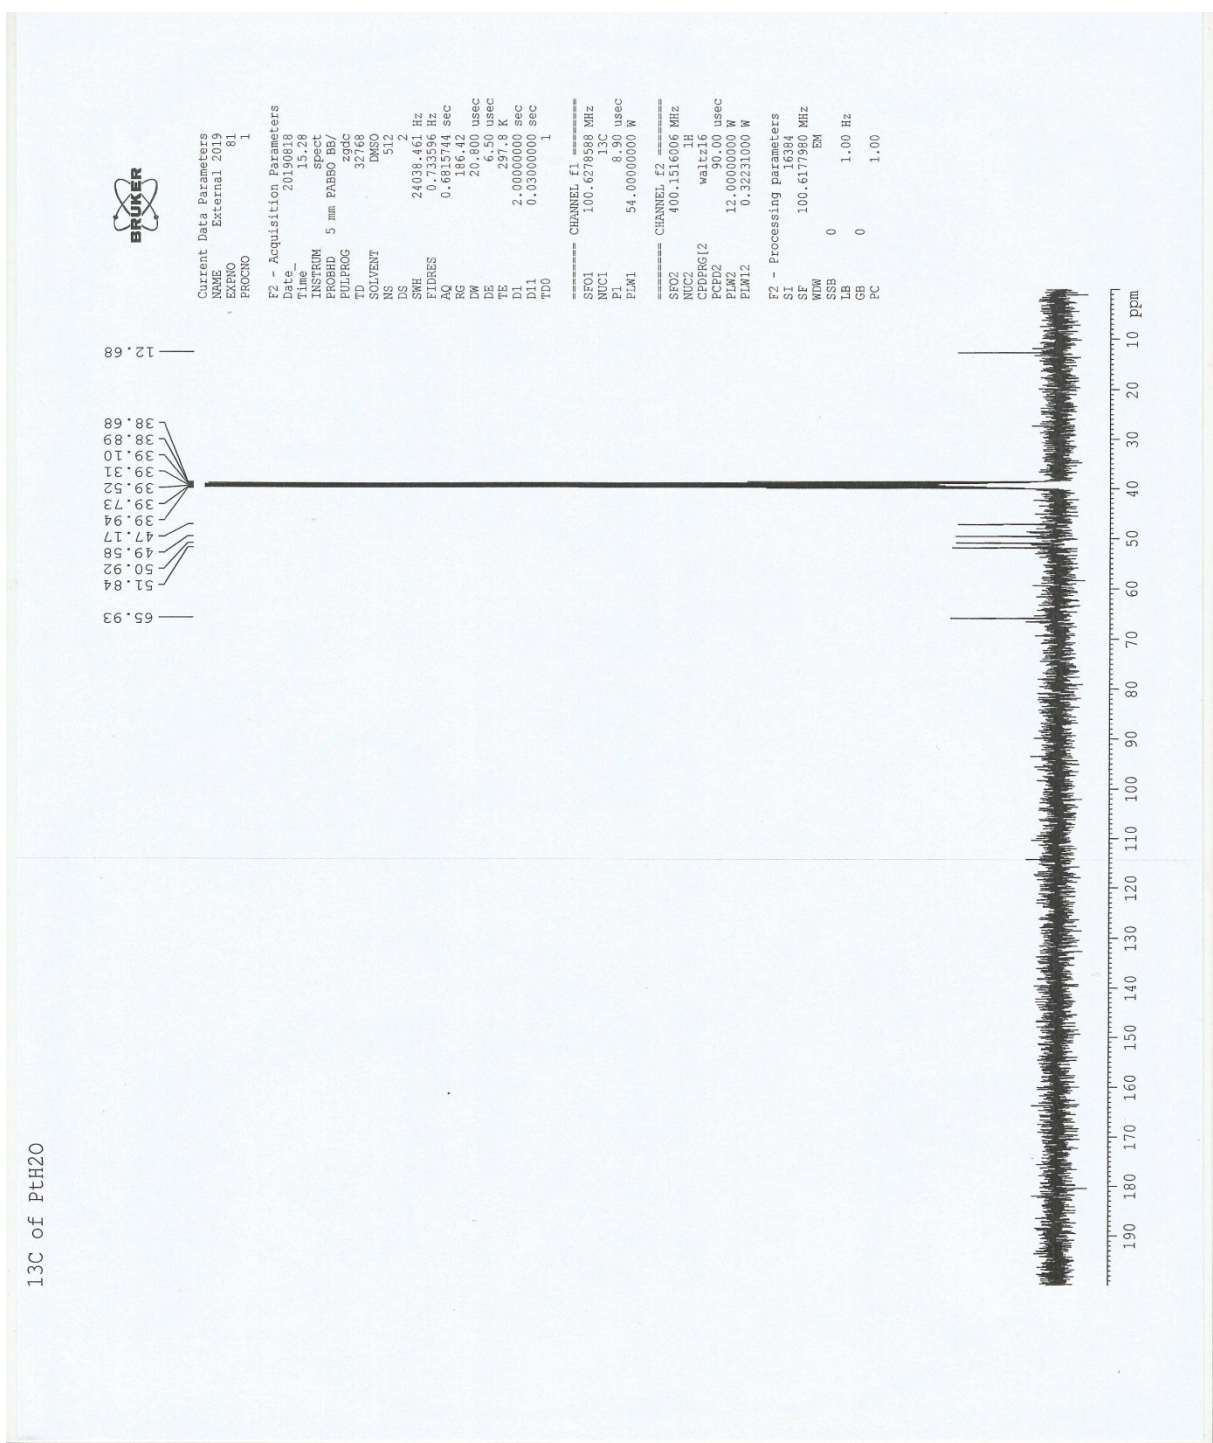

ESI Fig. S8.  $^{13}\text{C}$  NMR spectrum of complex **2** at 100 MHz in  $\text{DMSO-d}_6$ .



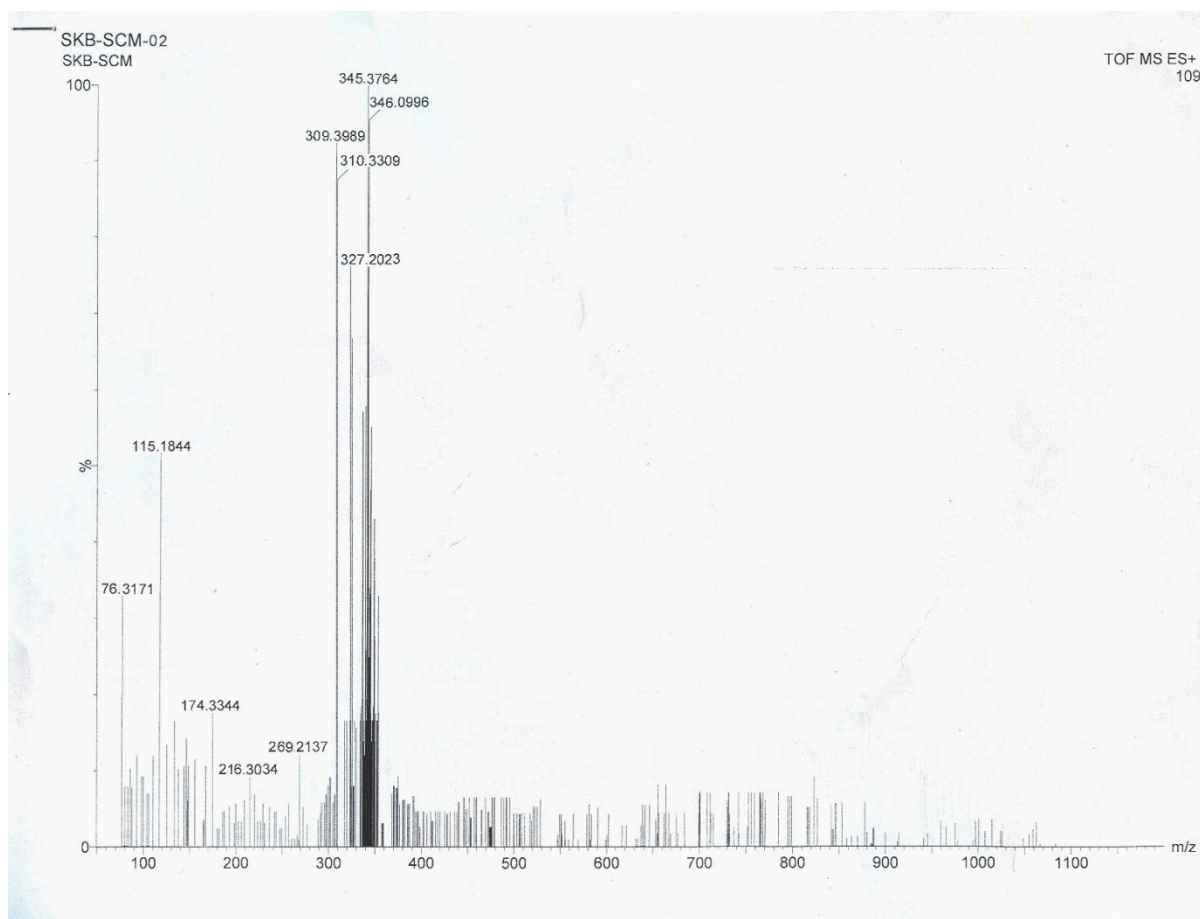

**ESI Fig S9.** ESI-Mass spectrum of complex **2** in water.

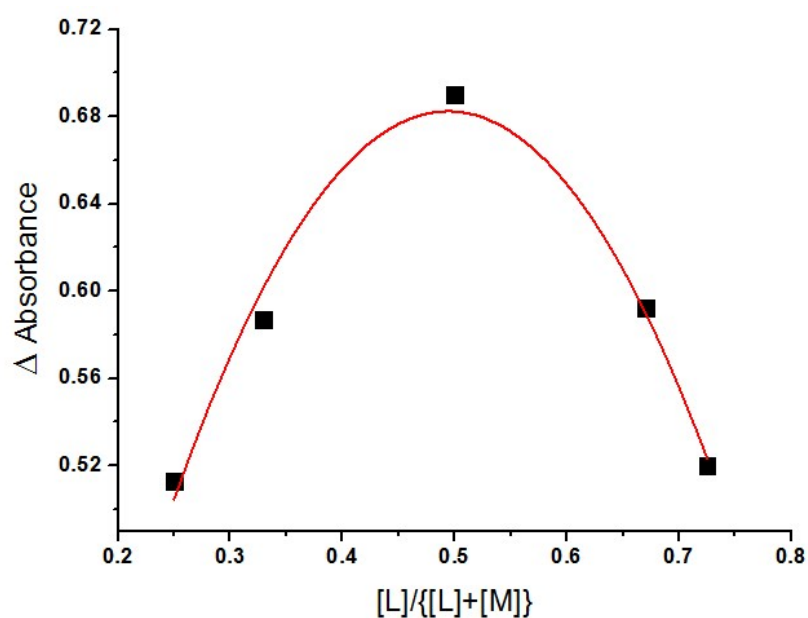

**ESI Fig S10.** Job's plot for the formation of complex **3**.

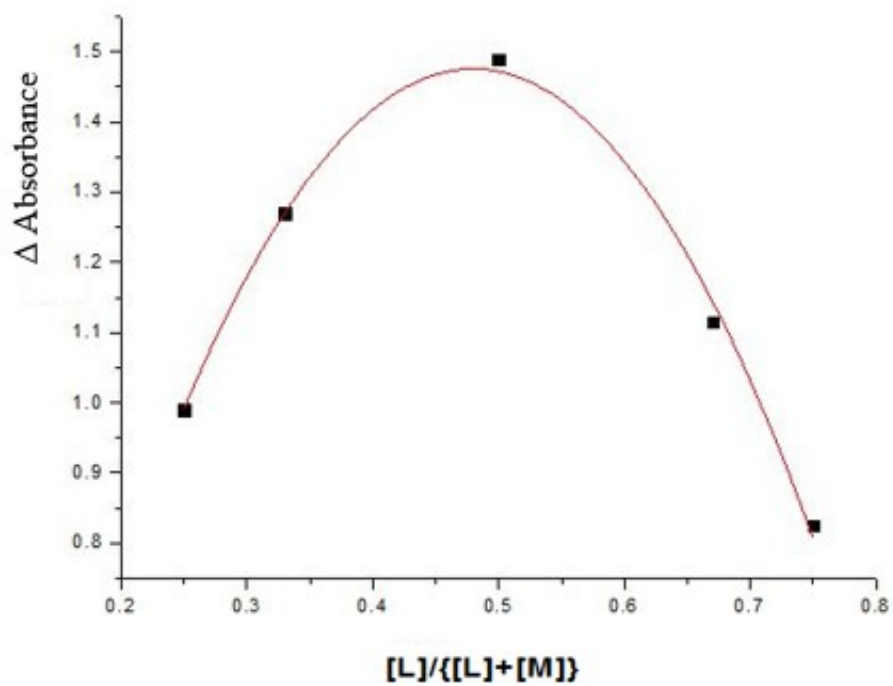

ESI Fig S11. Job's plot for the formation of complex 4.

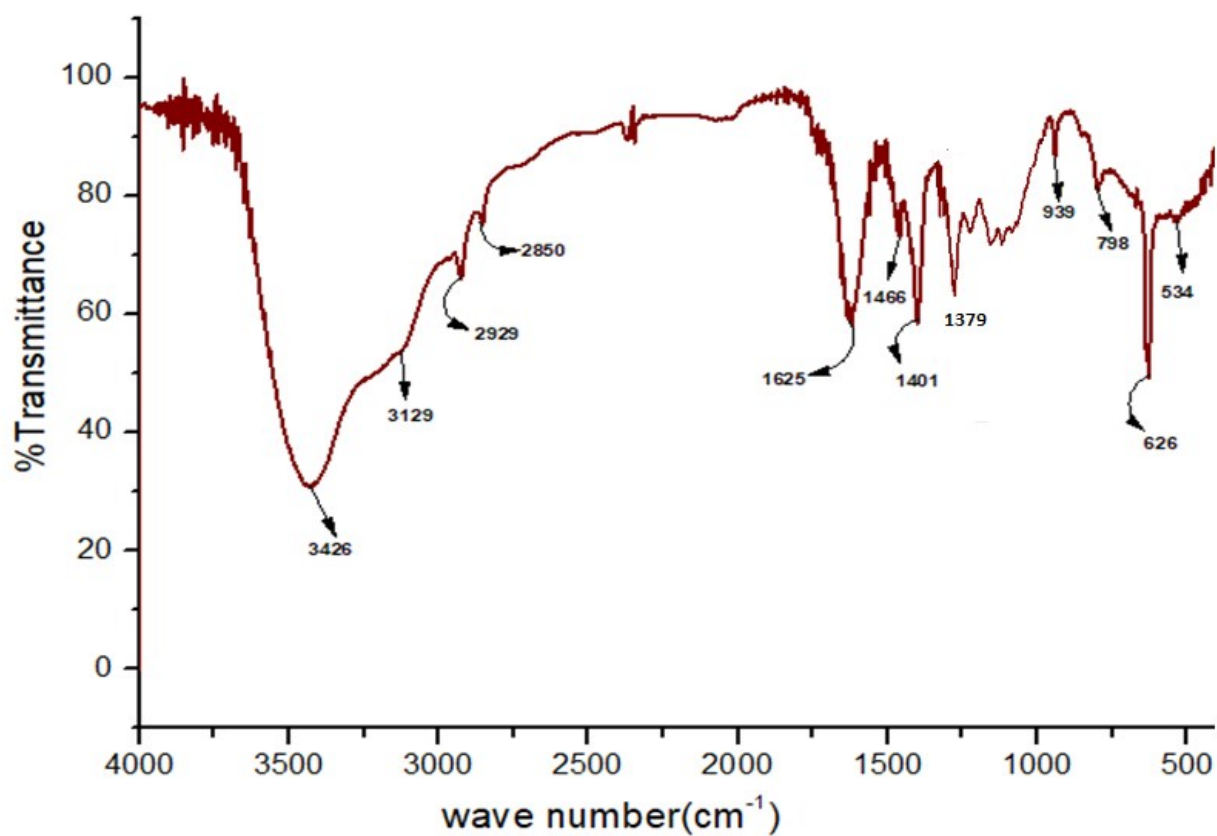

ESI Fig. S12. IR spectrum of complex 3 in KBr disk.

ESI Fig. S13.  $^1\text{H}$  NMR spectrum of complex **3** in DMSO- $d_6$  as solvent.

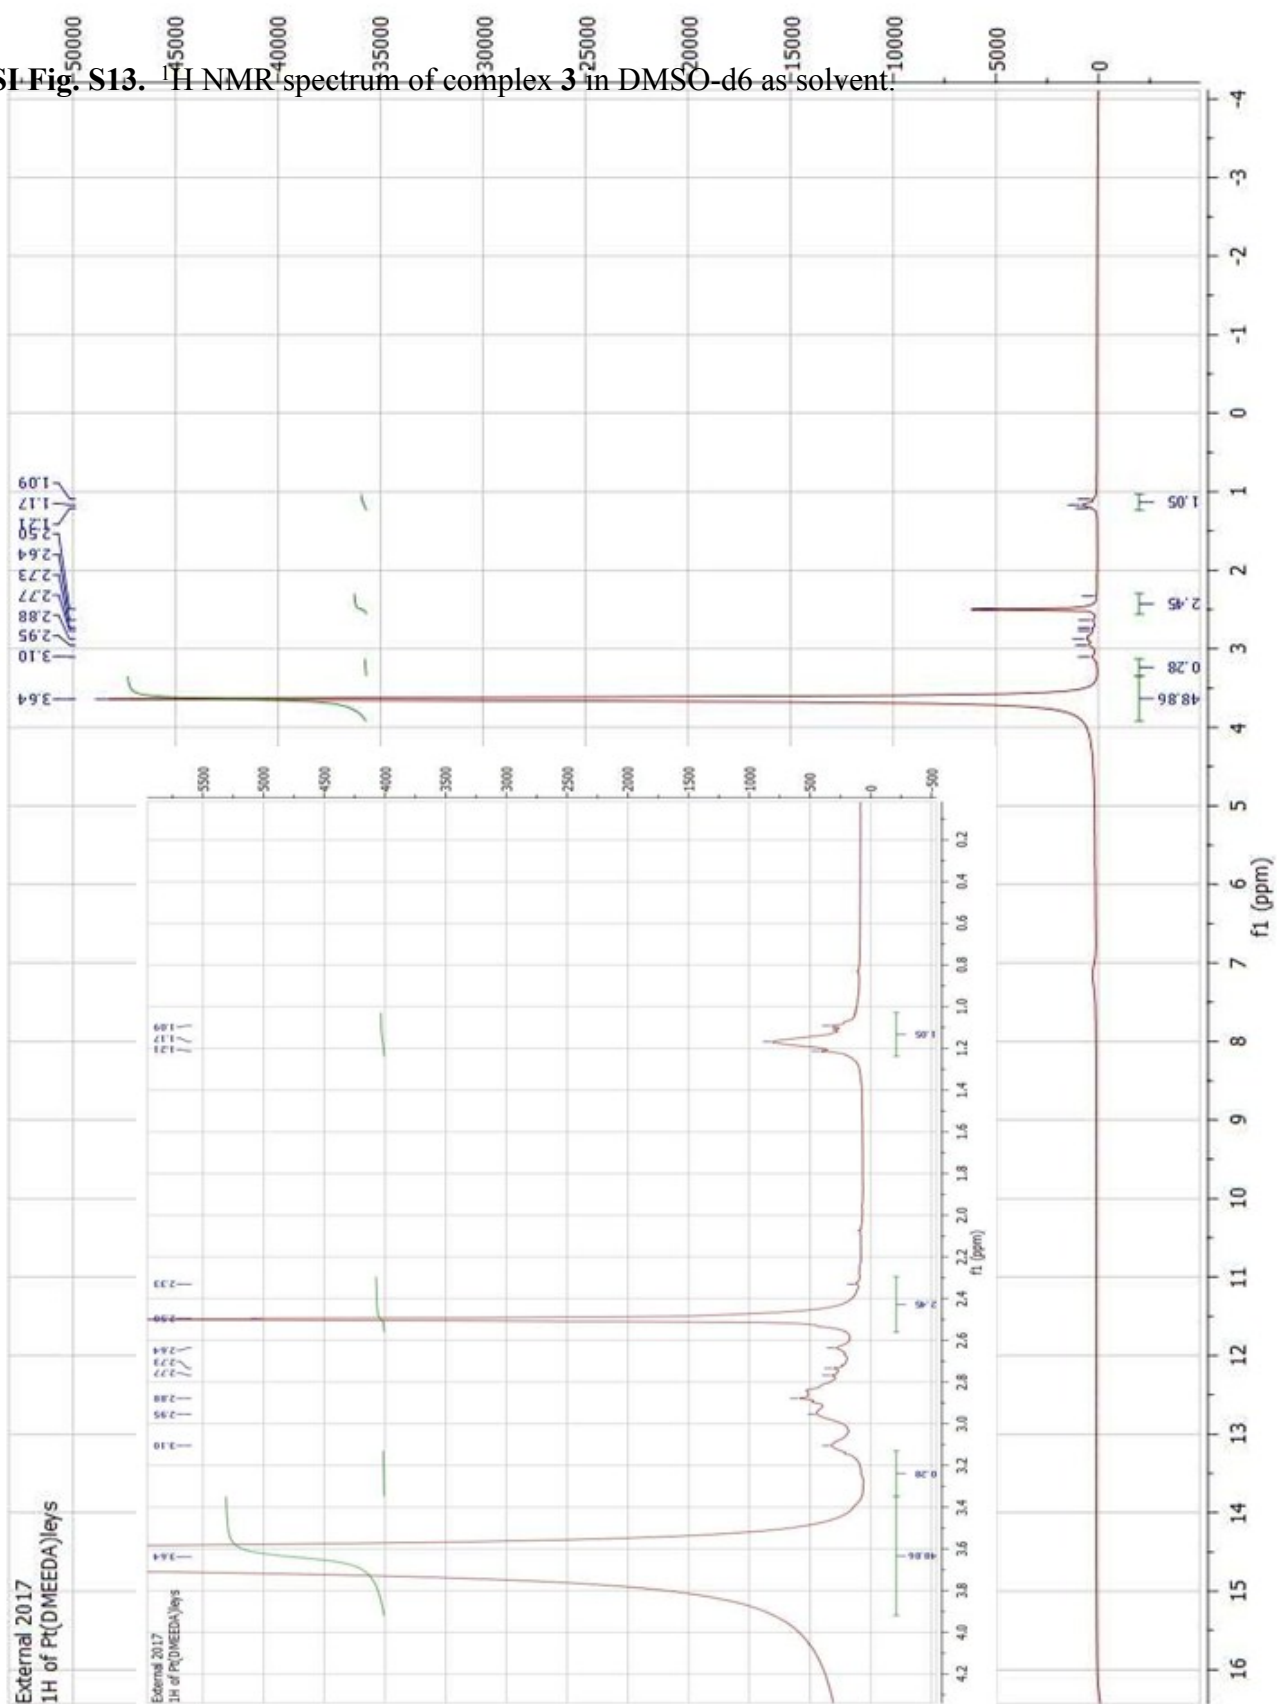

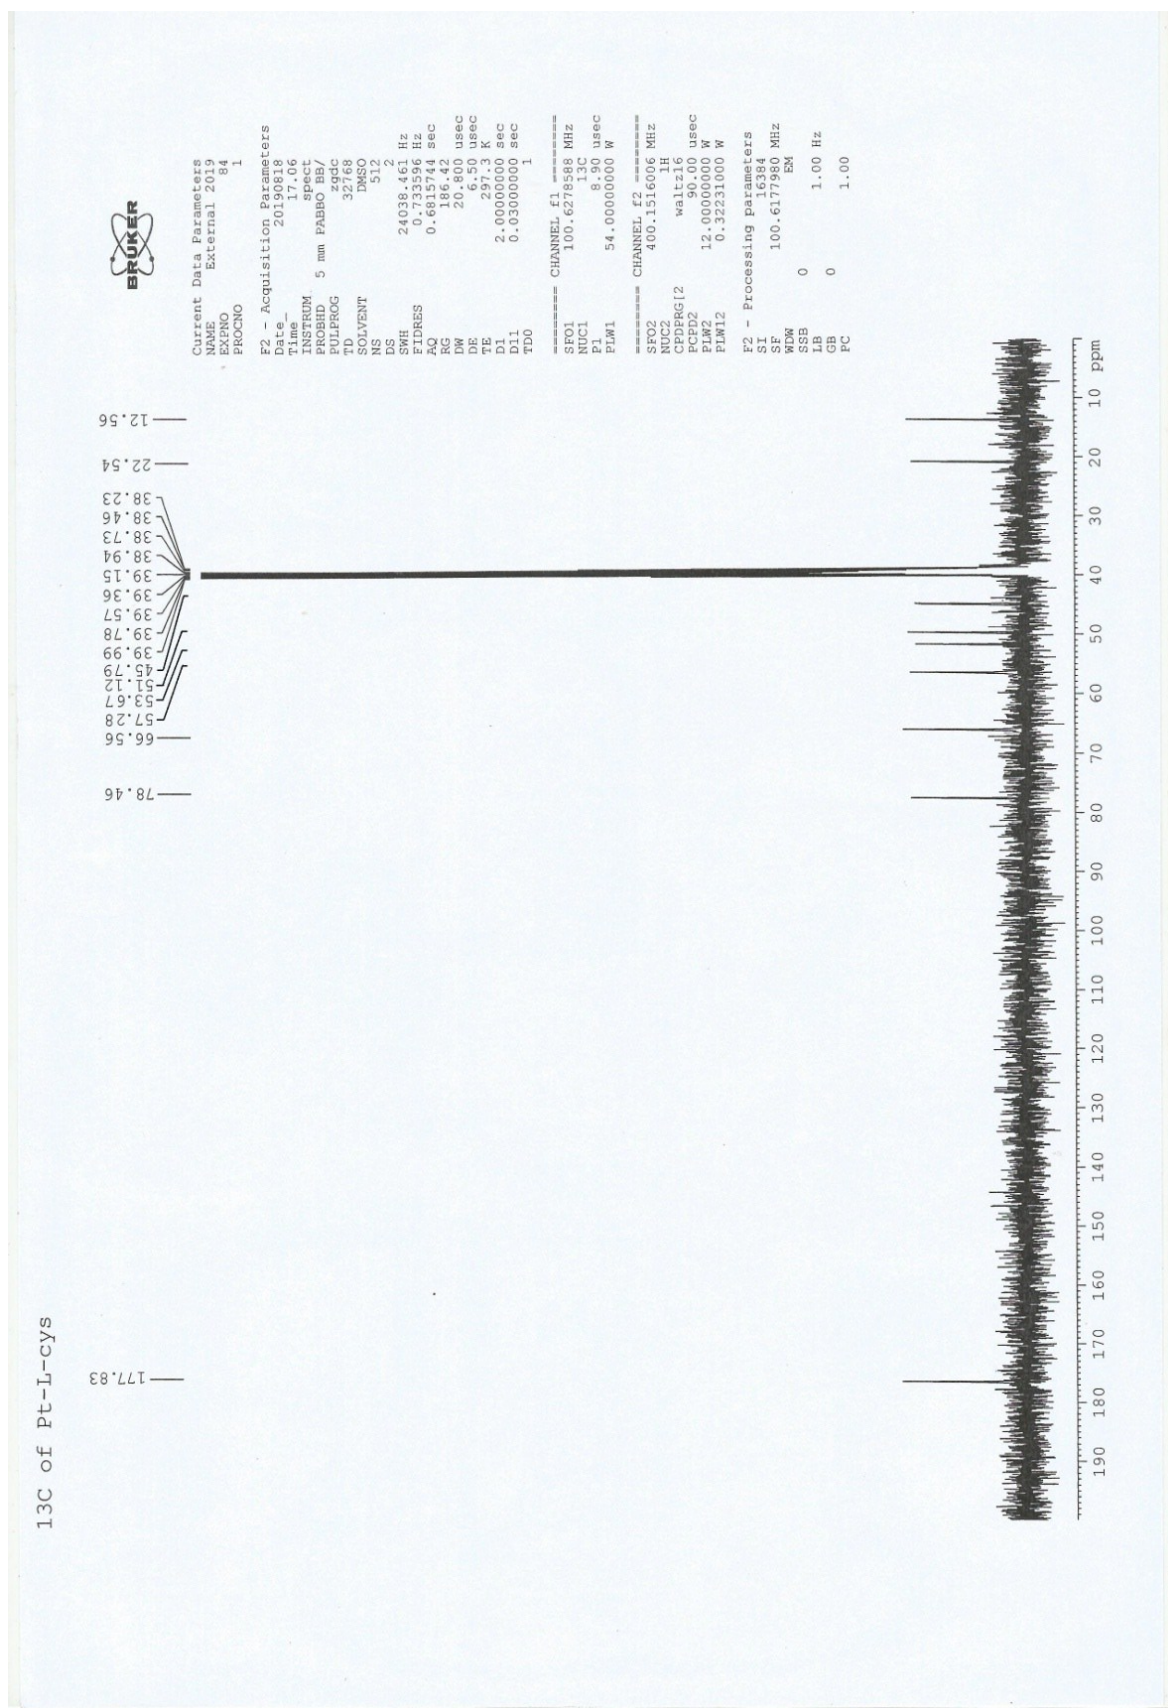

ESI Fig. S14.  $^{13}\text{C}$  NMR spectrum of complex **3** at 100 MHz in  $\text{DMSO-d}_6$ .



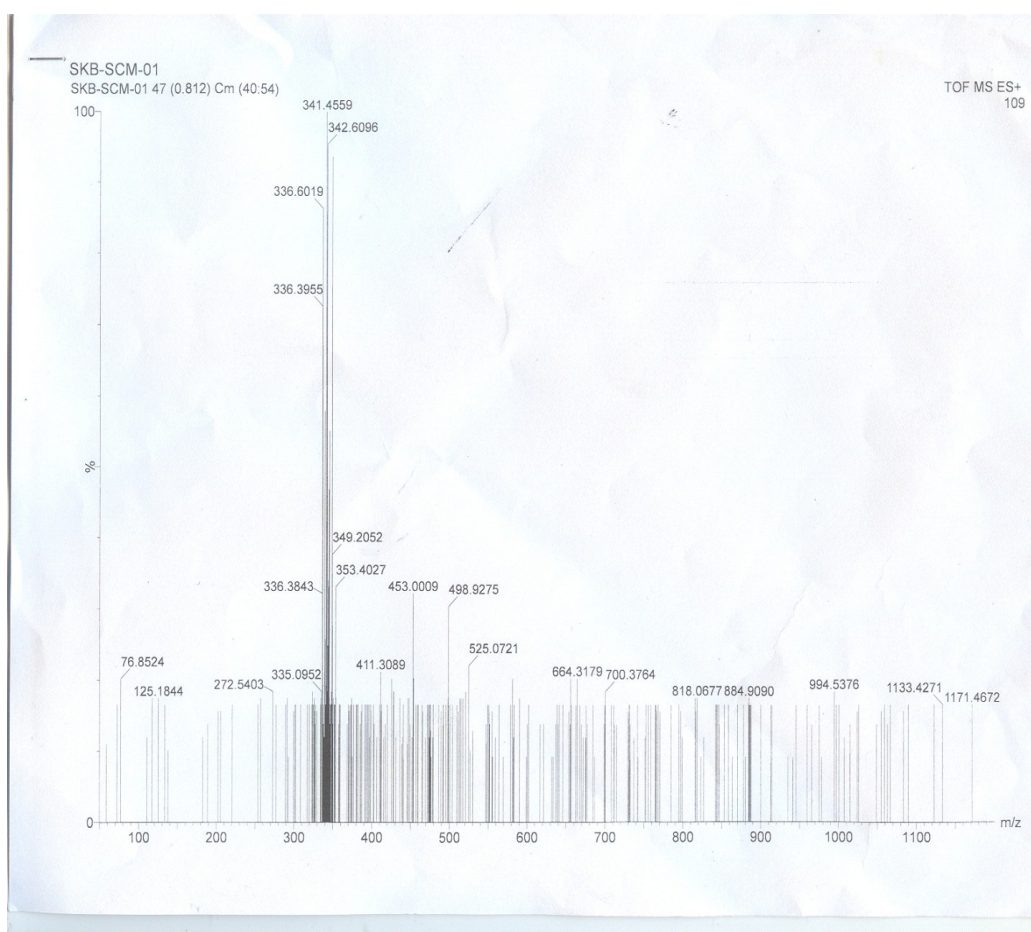

**ESI Fig. S15.** ESI-Mass spectrum of complex **3** in water.

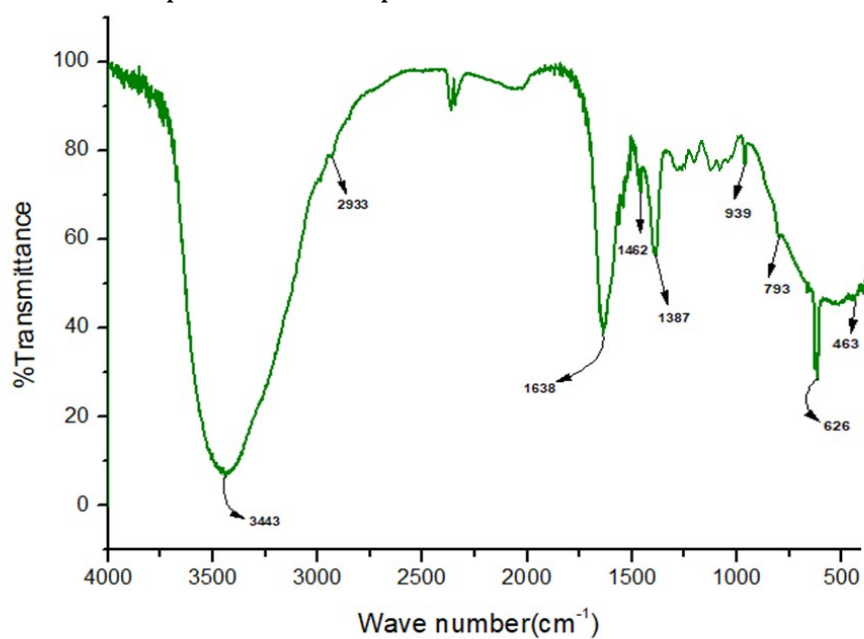

**ESI Fig. S16.** IR spectrum of complex **4** in KBr disk.

ESI Fig. S17.  $^1\text{H}$  NMR spectrum of complex **4** in  $\text{DMSO-d}_6$  as solvent (Inset: Magnified

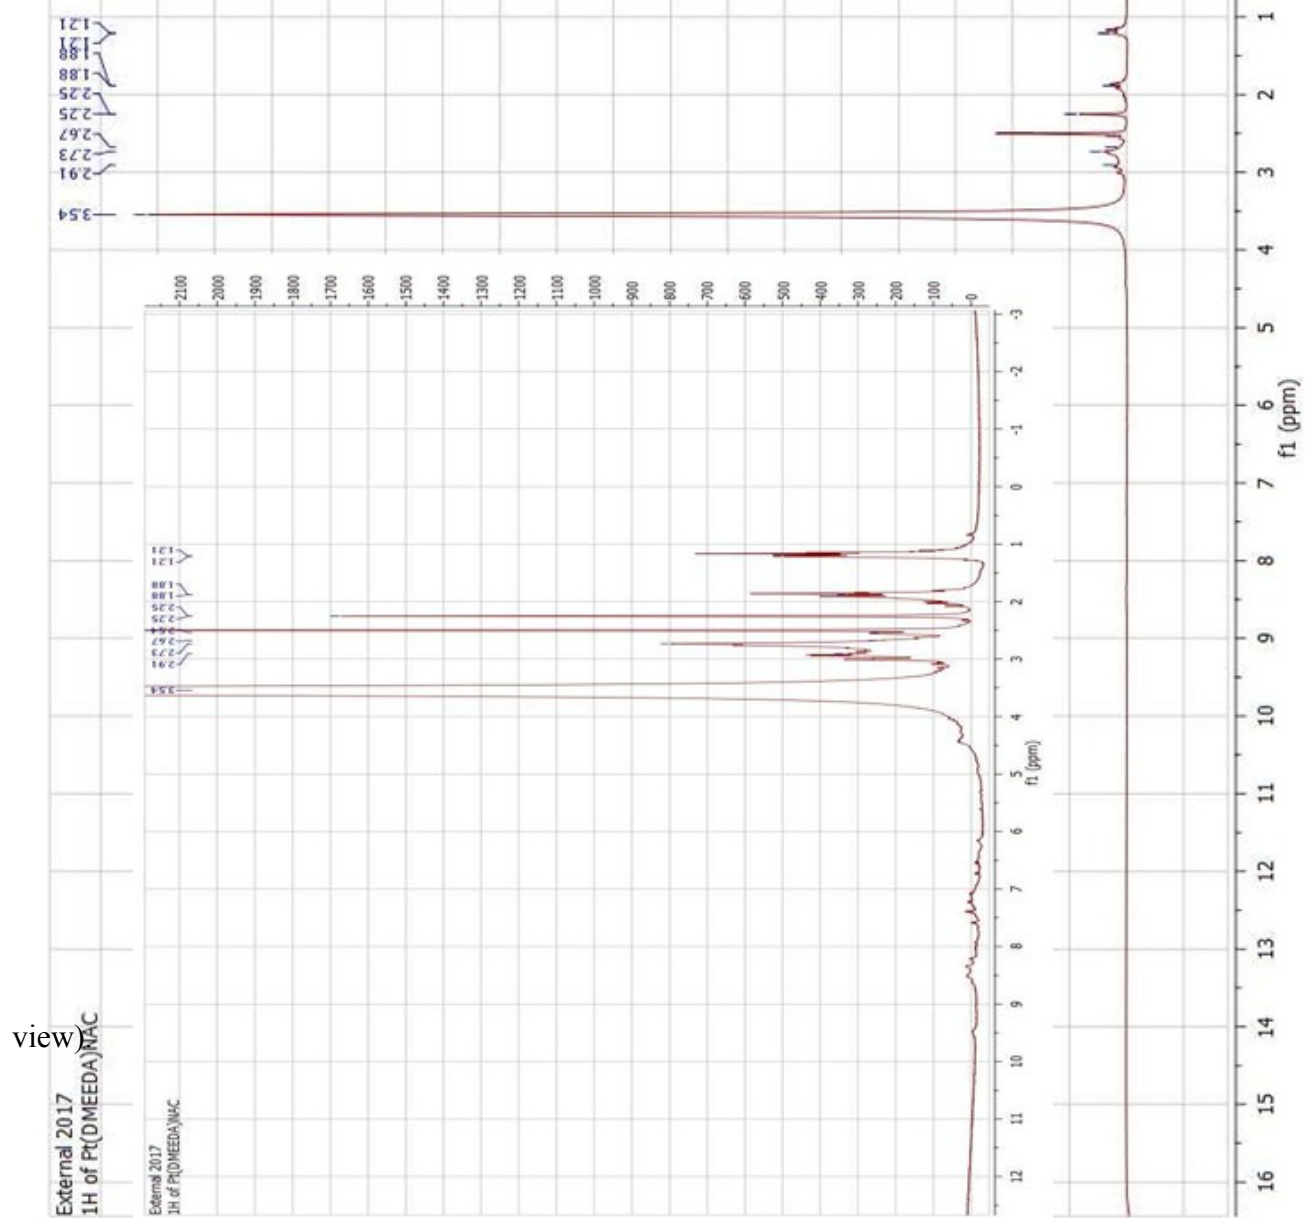

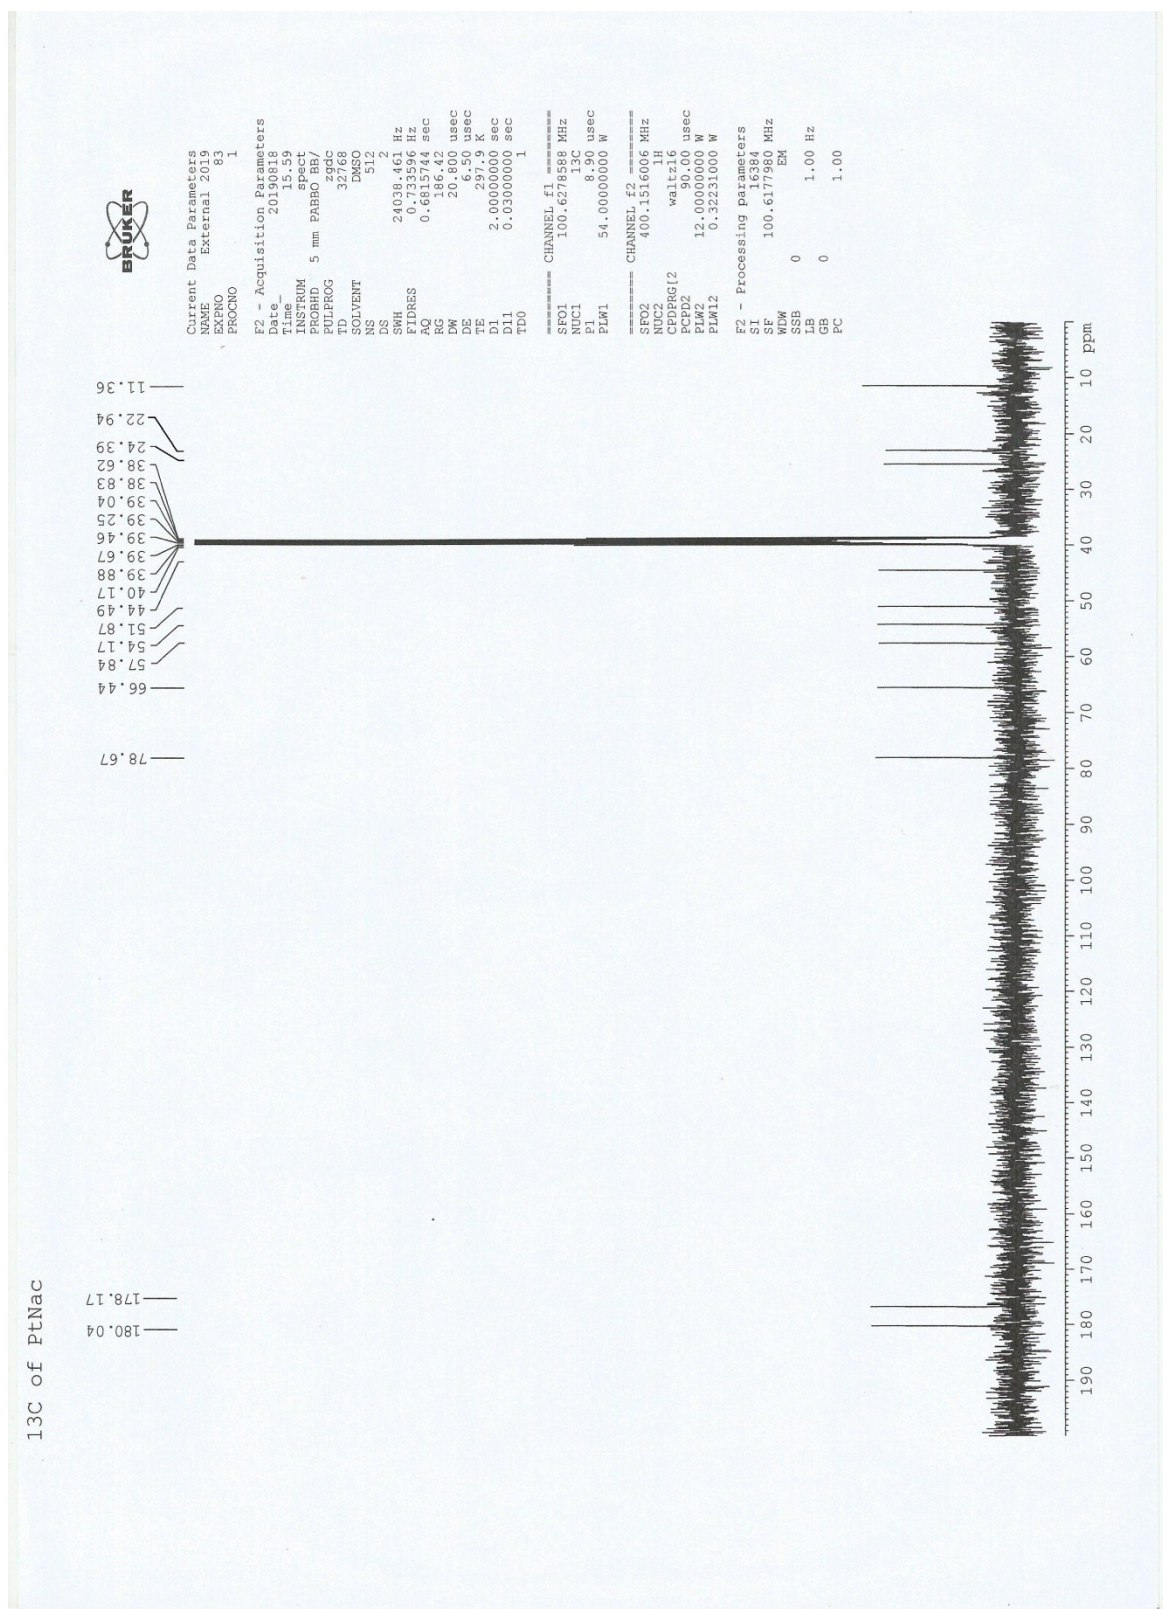

**ESI Fig. S18.**  $^{13}\text{C}$  NMR spectrum of complex **4** at 100 MHz in DMSO- $d_6$ .



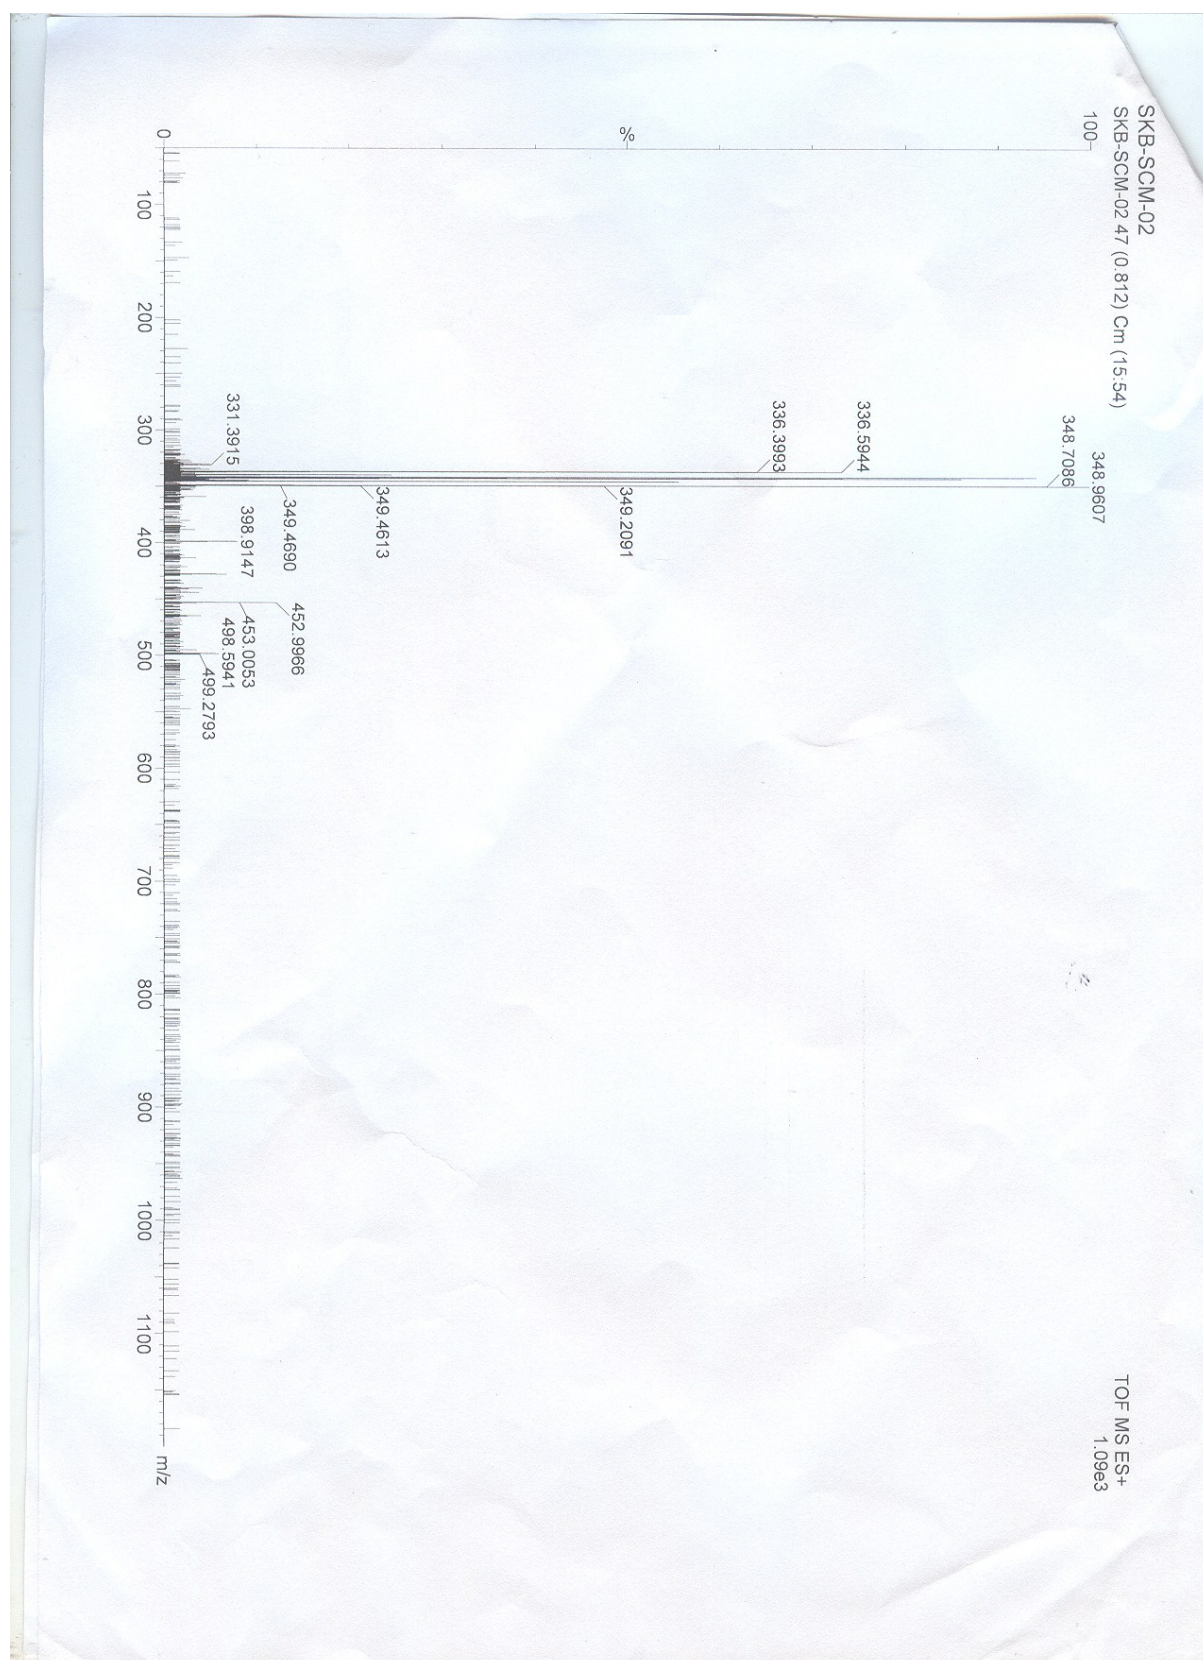

**ESI Fig. S19.** ESI-Mass spectrum of complex **4** in water.



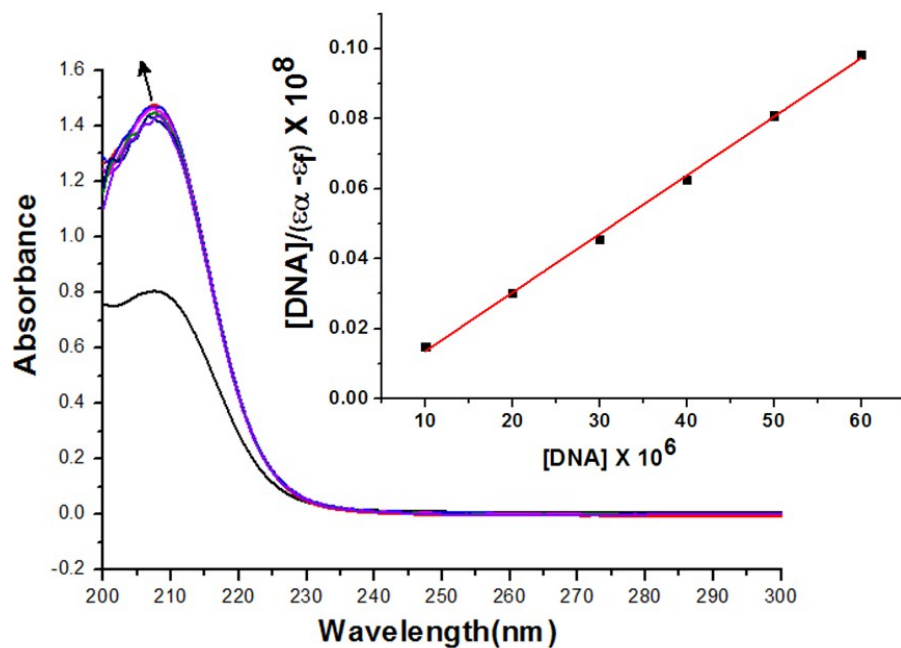

**ESI Fig. S20.** UV spectra of solutions containing complex **1** upon addition of CT-DNA. Arrow indicates the change in the absorbance on addition of DNA. Inset: Plots of  $[DNA]/[\epsilon_a - \epsilon_f]$  vs.  $[DNA]$  for the titration of the complex **1** with DNA.

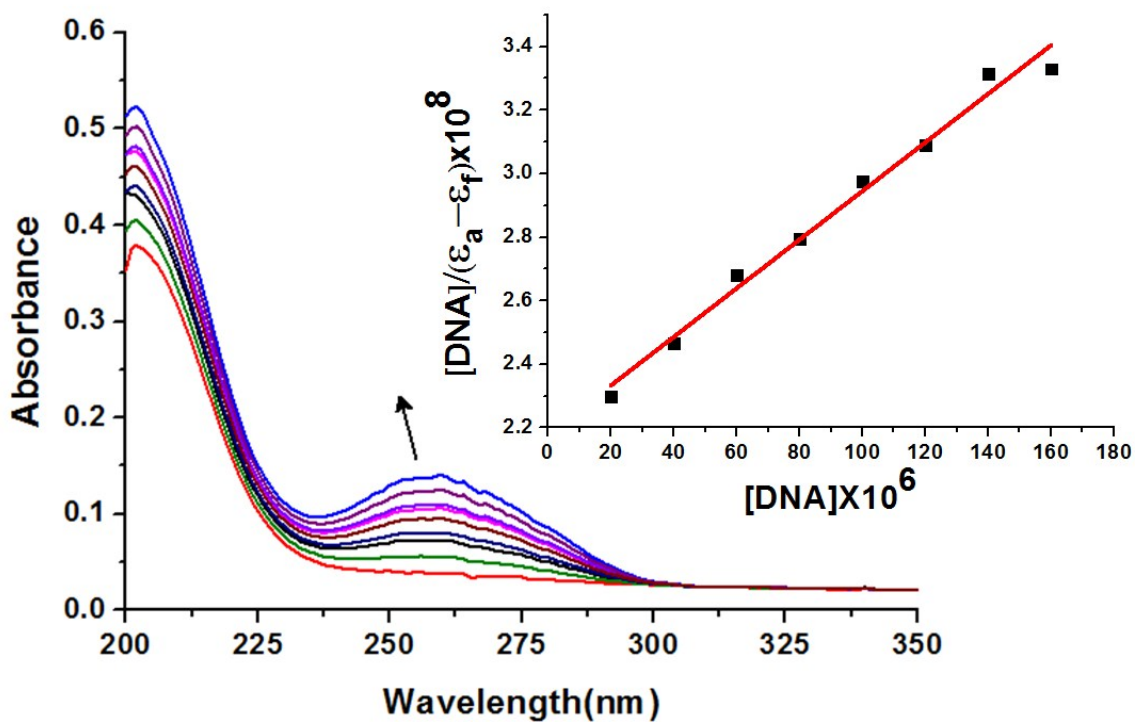

**ESI Fig. S21.** UV spectra of solutions containing complex **3** upon addition of CT-DNA. Arrow indicates the change in the absorbance on addition of DNA. Inset: Plots of  $[DNA]/[\epsilon_a - \epsilon_f]$  vs.  $[DNA]$  for the titration of the complex **3** with DNA.

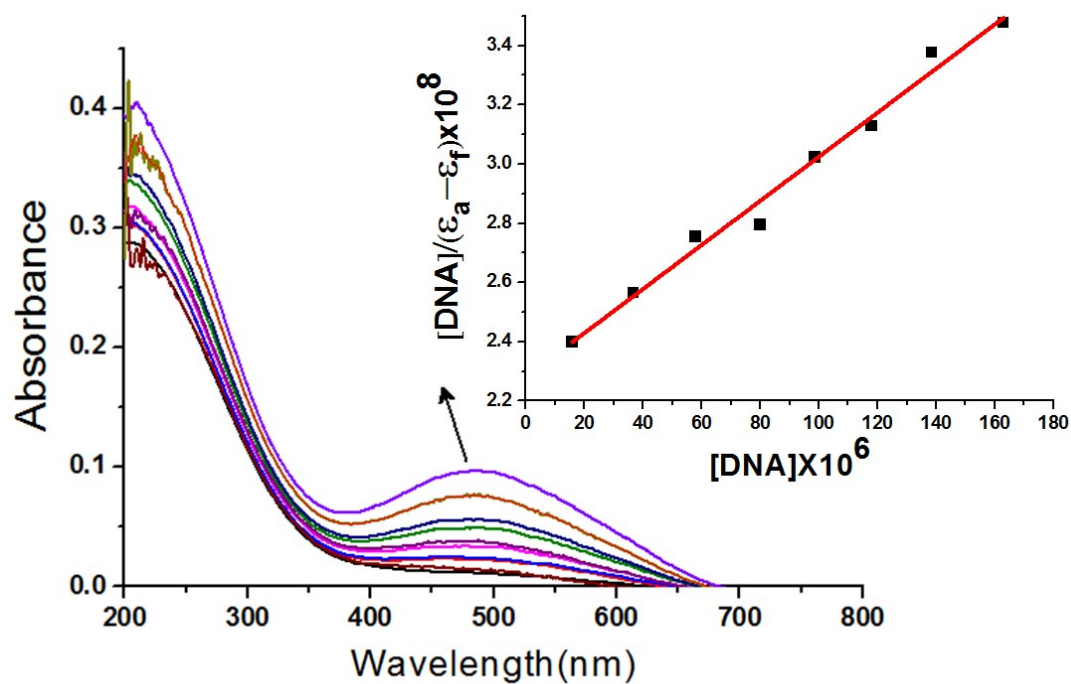

**ESI Fig. S22.** UV spectra of solutions containing complex **4** upon addition of CT-DNA: Inset: Plots of  $[DNA]/[\epsilon_a - \epsilon_f]$  vs.  $[DNA]$  for the titration of the complex **4** with DNA.

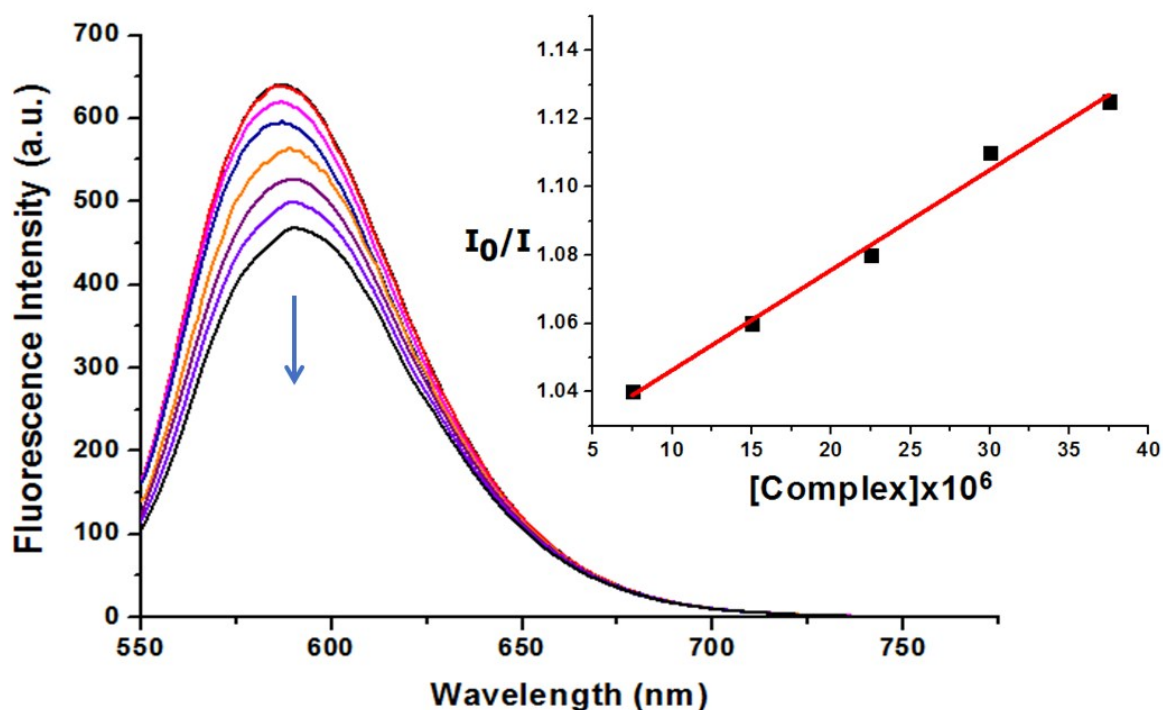

**ESI Fig. S23.** Emission spectra ( $\lambda = 537$  nm) for EB-DNA ( $[EB] = 20 \mu M$ ,  $[DNA] = 20 \mu M$ ) in the absence and presence of increasing amounts of complex **2**. (Inset: Plot of  $I_0/I$  versus [complex **2**]).

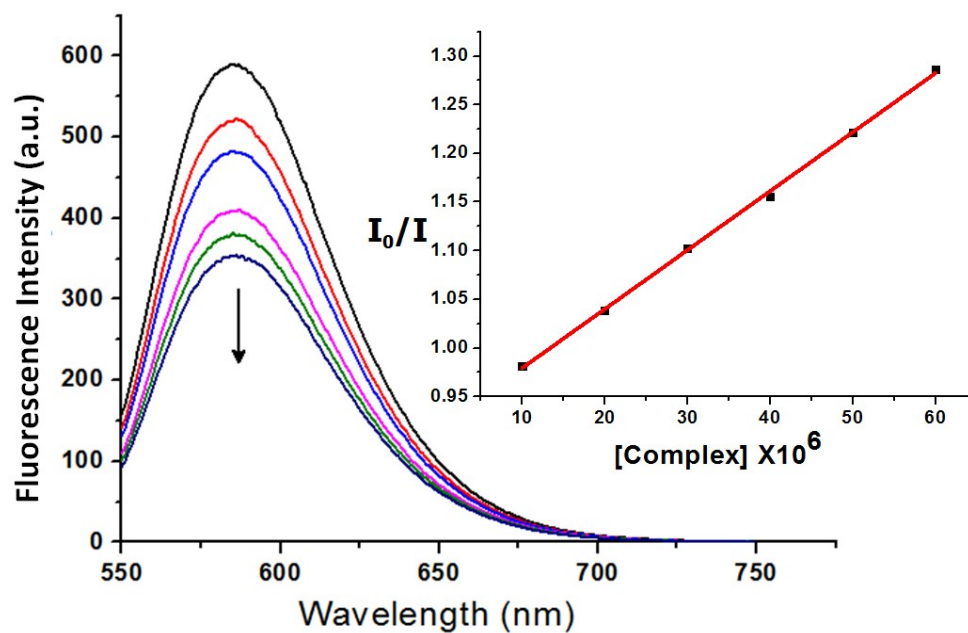

**ESI Fig. S24.** Emission spectra ( $\lambda = 537$  nm) for EB–DNA ( $[\text{EB}] = 20 \mu\text{M}$ ,  $[\text{DNA}] = 20 \mu\text{M}$ ) in the absence and presence of increasing amounts of complex **3**. (Inset: Plot of  $I_0/I$  versus [complex **3**]).

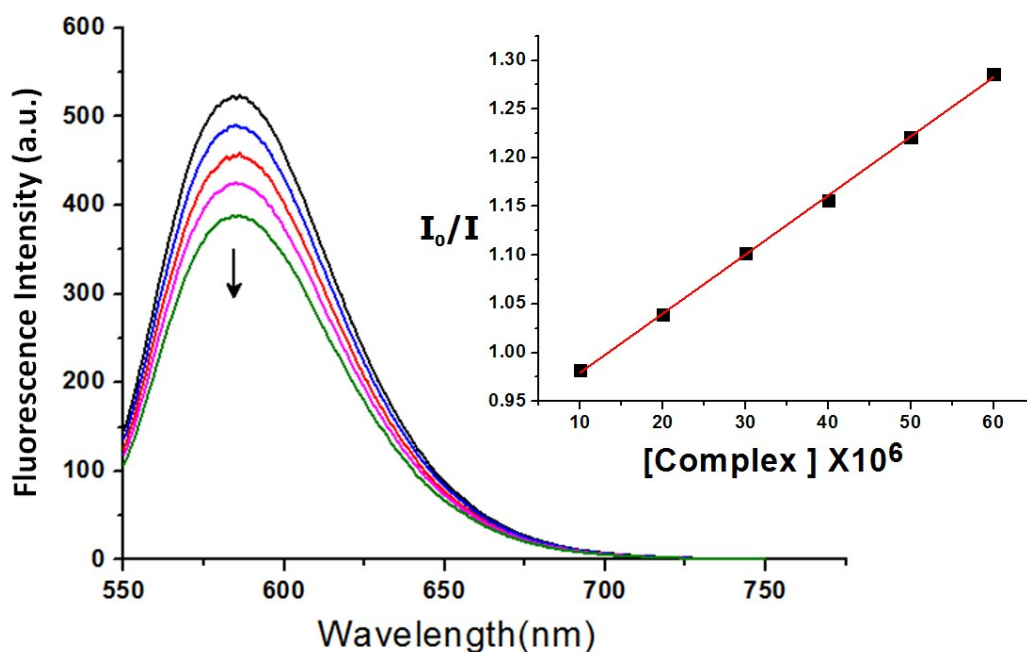

**ESI Fig. S25.** Emission spectra ( $\lambda = 537$  nm) for EB–DNA ( $[\text{EB}] = 20 \mu\text{M}$ ,  $[\text{DNA}] = 20 \mu\text{M}$ ) in the absence and presence of increasing amounts of complex **4**. (Inset: Plot of  $I_0/I$  versus [complex **4**]).

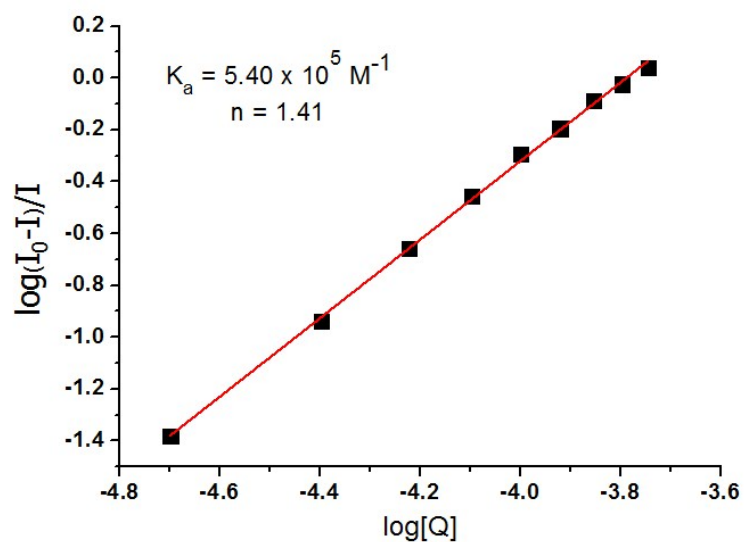

ESI Fig. S26. Scatchard plot of complex 1.

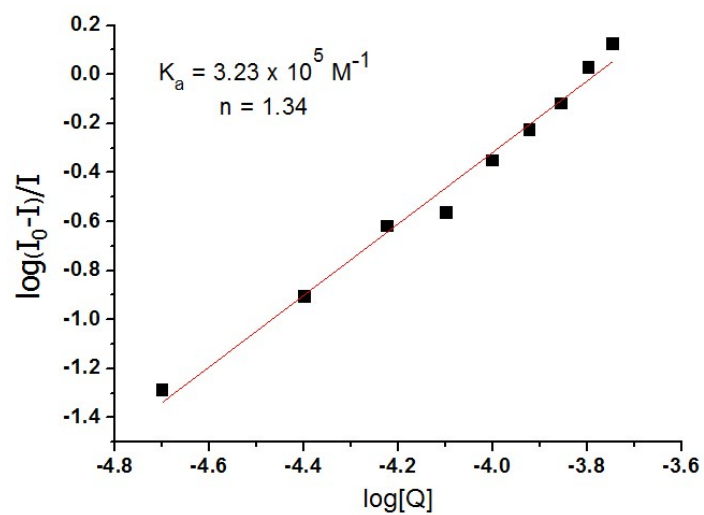

ESI Fig. S27. Scatchard plot of complex 2.

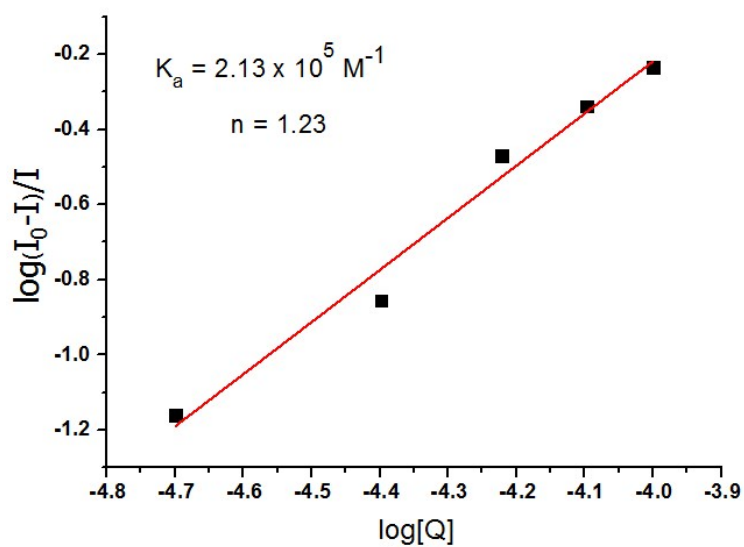

ESI Fig. S28. Scatchard plot of complex 3.



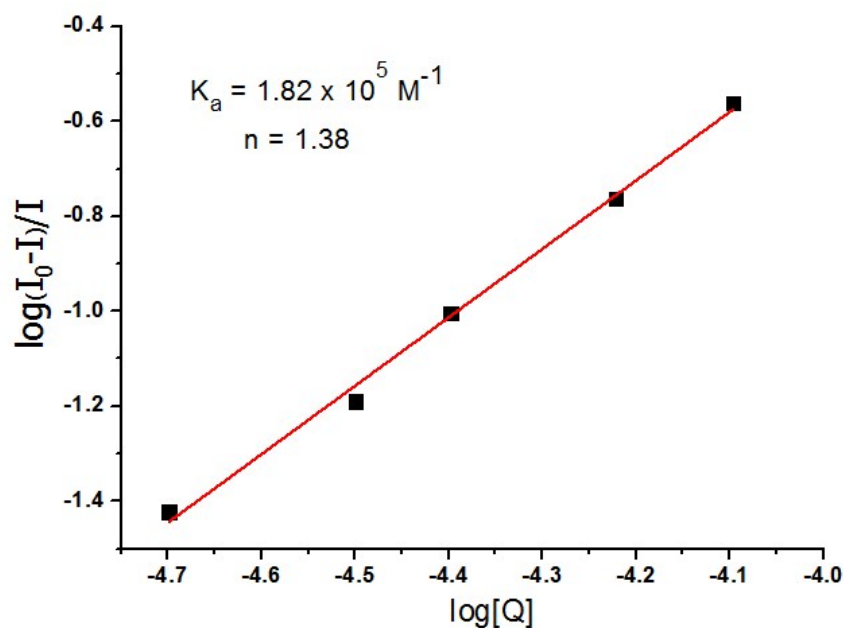

ESI Fig. S29. Scatchard plot of complex 4.

### 1. Cell lines and culture

Normal healthy Swiss albino mice were anaesthetised, liver tissues perfused with sterile, chilled PBS (phosphate buffer saline, 10 mM, pH 7.4) were minced and digested in PBS containing 0.5 % trypsin for 45 min at 37°C. Cells were separated after tissue digestion by filtration through nylon mesh followed by several wash with PBS. Freshly isolated hepatocytes were kept in DMEM containing 2 % FBS (Gibco) and antibiotics, and finally resuspended in medium and plated in a 6 well plate, incubated in a humidified, 95 % O<sub>2</sub>/ 5 % CO<sub>2</sub> atmosphere at 37 °C. Complex **1** - **4** were dissolved in sterile water and diluted with culture medium to obtain the desired concentrations. Cisplatin [Cisgland from Gland Pharma Limited] at the same concentrations was used as positive control. Control cells were cultured in medium alone and received equal volume of sterile distilled water only.
